# Supplementary material
Source: publisher figshare collection journal article supplement (https://acs.figshare.com/ndownloader/files/4203112)

# checkCIF/PLATON report

You have not supplied any structure factors. As a result the full set of tests cannot be run.

No syntax errors found.      CIF dictionary      Interpreting this report

## Datablock: a

---

|                 |                             |                                |
|-----------------|-----------------------------|--------------------------------|
| Bond precision: | C-C = 0.0064 Å              | Wavelength=0.71073             |
| Cell:           | a=11.9767(3)                | b=24.3621(7)      c=12.6637(3) |
|                 | alpha=90                    | beta=101.163(3)      gamma=90  |
| Temperature:    | 173 K                       |                                |
|                 | Calculated                  | Reported                       |
| Volume          | 3625.08(17)                 | 3625.07(16)                    |
| Space group     | P 21/n                      | P2(1)/n                        |
| Hall group      | -P 2yn                      | ?                              |
|                 | 2(C20 H28 N12 Na O9), 2(C6  |                                |
| Moiety formula  | H5 N O3), 2(Br0.47 H2 O), ? |                                |
|                 | 1.06(Br),                   |                                |
| Sum formula     | C52 H86 Br2 N26 Na2 O35     | C52 H86 Br2 N26 Na2 O35        |
| Mr              | 1841.25                     | 1841.25                        |
| Dx,g cm-3       | 1.687                       | 1.687                          |
| Z               | 2                           | 2                              |
| Mu (mm-1)       | 1.243                       | 1.243                          |
| F000            | 1904.0                      | 1904.0                         |
| F000'           | 1903.94                     |                                |
| h,k,lmax        | 14,28,15                    | 14,28,15                       |
| Nref            | 6386                        | 6374                           |
| Tmin,Tmax       | 0.577,0.689                 | 0.577,0.689                    |
| Tmin'           | 0.566                       |                                |

Correction method= MULTI-SCAN

Data completeness= 0.998      Theta(max)= 25.000

R(reflections)= 0.0767( 5365)      wR2(reflections)= 0.2226( 6374)

S = 1.070      Npar= 551

---

The following ALERTS were generated. Each ALERT has the format

**test-name\_ALERT\_alert-type\_alert-level.**

Click on the hyperlinks for more details of the test.

---

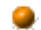

### Alert level B

PLAT220\_ALERT\_2\_B Large Non-Solvent      0      Ueq(max)/Ueq(min) ...      4.4 Ratio

|                   |                      |      |                     |      |     |           |
|-------------------|----------------------|------|---------------------|------|-----|-----------|
| PLAT222_ALERT_3_B | Large Non-Solvent    | H    | Uiso(max)/Uiso(min) | ..   | 7.3 | Ratio     |
| PLAT417_ALERT_2_B | Short Inter D-H..H-D | H9   | ..                  | H105 | ..  | 2.05 Ang. |
| PLAT417_ALERT_2_B | Short Inter D-H..H-D | H105 | ..                  | H102 | ..  | 1.84 Ang. |
| PLAT420_ALERT_2_B | D-H Without Acceptor | O3W  | -                   | H103 | ... | ?         |

### ● Alert level C

|                   |                            |           |                    |            |
|-------------------|----------------------------|-----------|--------------------|------------|
| PLAT303_ALERT_2_C | Full Occupancy H-Atom      | H102      | with # Connections | 1.47       |
| PLAT341_ALERT_3_C | Low Bond Precision on      | C-C Bonds | .....              | 0.0064 Ang |
| PLAT480_ALERT_4_C | Long H...A H-Bond Reported | H107      | .. O4 ..           | 2.66 Ang.  |
| PLAT480_ALERT_4_C | Long H...A H-Bond Reported | H105      | .. BR1' ..         | 2.97 Ang.  |
| PLAT480_ALERT_4_C | Long H...A H-Bond Reported | H206      | .. BR1' ..         | 3.12 Ang.  |
| PLAT481_ALERT_4_C | Long D...A H-Bond Reported | O6W       | .. BR1' ..         | 3.93 Ang.  |
| PLAT774_ALERT_1_C | Suspect X-Y Bond in CIF:   | NA1       | -- NA1 ..          | 3.57 Ang.  |

### ● Alert level G

|                   |                                                  |          |
|-------------------|--------------------------------------------------|----------|
| PLAT004_ALERT_5_G | Info: Polymeric Structure Found with Dimension   | 1        |
| PLAT005_ALERT_5_G | No _iucr_refine_instructions_details in CIF      | ?        |
| PLAT007_ALERT_5_G | Note: Number of Unrefined D-H Atoms              | 17       |
| PLAT072_ALERT_2_G | SHELXL First Parameter in WGHT Unusually Large.  | 0.12     |
| PLAT083_ALERT_2_G | SHELXL Second Parameter in WGHT Unusually Large. | 14.77    |
| PLAT128_ALERT_4_G | Alternate Setting of Space-group P21/c           | P21/n    |
| PLAT302_ALERT_4_G | Note: Anion/Solvent Disorder                     | 23 Perc. |
| PLAT311_ALERT_2_G | Isolated Disordered Oxygen Atom (No H's ?)       | O9W'     |
| PLAT311_ALERT_2_G | Isolated Disordered Oxygen Atom (No H's ?)       | O9W      |
| PLAT720_ALERT_4_G | Number of Unusual/Non-Standard Labels            | 17       |
| PLAT793_ALERT_4_G | The Model has Chirality at C3 (Verify)           | R        |
| PLAT793_ALERT_4_G | The Model has Chirality at C4 (Verify)           | R        |
| PLAT793_ALERT_4_G | The Model has Chirality at C8 (Verify)           | S        |
| PLAT793_ALERT_4_G | The Model has Chirality at C10 (Verify)          | R        |
| PLAT793_ALERT_4_G | The Model has Chirality at C19 (Verify)          | R        |
| PLAT793_ALERT_4_G | The Model has Chirality at C20 (Verify)          | S        |

0 **ALERT level A** = Most likely a serious problem - resolve or explain  
5 **ALERT level B** = A potentially serious problem, consider carefully  
7 **ALERT level C** = Check. Ensure it is not caused by an omission or oversight  
16 **ALERT level G** = General information/check it is not something unexpected

1 ALERT type 1 CIF construction/syntax error, inconsistent or missing data  
9 ALERT type 2 Indicator that the structure model may be wrong or deficient  
2 ALERT type 3 Indicator that the structure quality may be low  
13 ALERT type 4 Improvement, methodology, query or suggestion  
3 ALERT type 5 Informative message, check

It is advisable to attempt to resolve as many as possible of the alerts in all categories. Often the minor alerts point to easily fixed oversights, errors and omissions in your CIF or refinement strategy, so attention to these fine details can be worthwhile. In order to resolve some of the more serious problems it may be necessary to carry out additional measurements or structure refinements. However, the purpose of your study may justify the reported deviations and the more serious of these should normally be commented upon in the discussion or experimental section of a paper or in the "special\_details" fields of the CIF. checkCIF was carefully designed to identify outliers and unusual parameters, but every test has its limitations and alerts that are not important in a particular case may appear. Conversely, the absence of alerts does not guarantee there are no aspects of the results needing attention. It is up to the individual to critically assess their own results and, if necessary, seek expert advice.

### **Publication of your CIF in IUCr journals**

A basic structural check has been run on your CIF. These basic checks will be run on all CIFs submitted for publication in IUCr journals (*Acta Crystallographica*, *Journal of Applied Crystallography*, *Journal of Synchrotron Radiation*); however, if you intend to submit to *Acta Crystallographica Section C* or *E*, you should make sure that full publication checks are run on the final version of your CIF prior to submission.

### **Publication of your CIF in other journals**

Please refer to the *Notes for Authors* of the relevant journal for any special instructions relating to CIF submission.

---

**PLATON version of 22/10/2012; check.def file version of 16/10/2012**

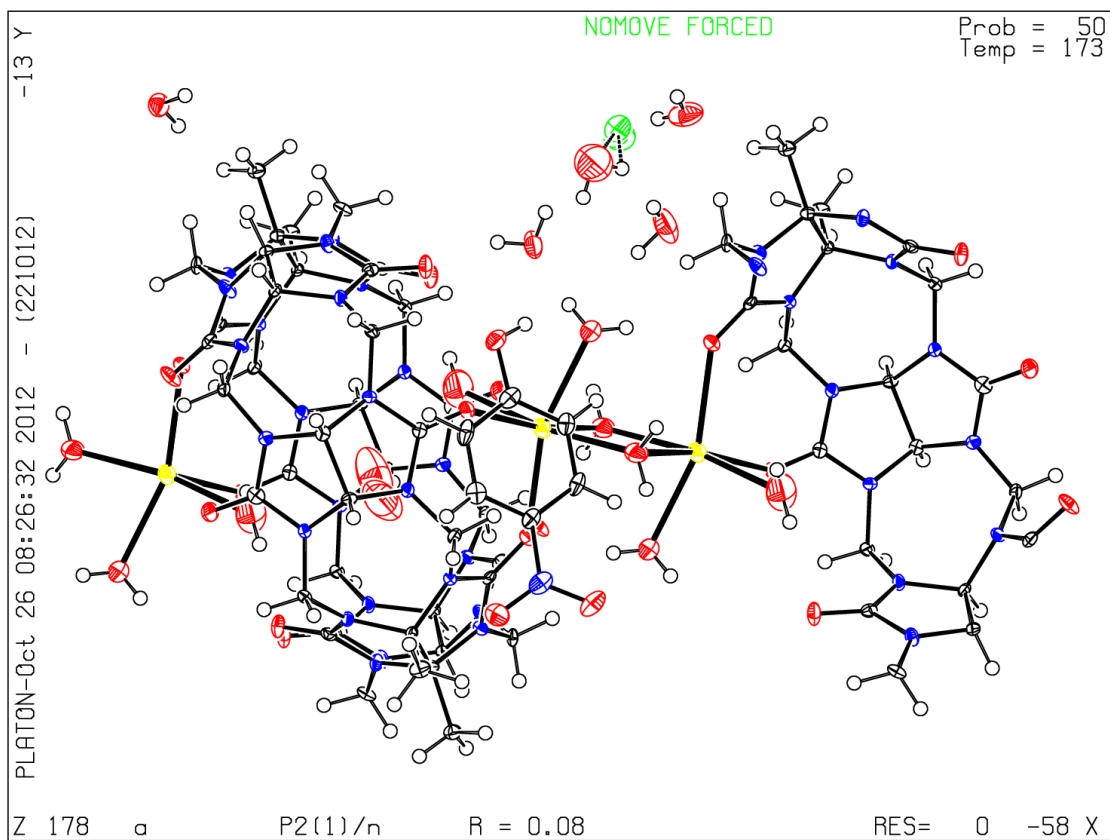

Supplement: Supplementary file 1 [file 4203112]
